# Supplementary material for: Whole genome-based characterisation of antimicrobial resistance and genetic diversity in Campylobacter jejuni and Campylobacter coli from ruminants
Source: PubMed Central journal article supplement (PMC8076188; doi:10.1038/s41598-021-88318-0), 2021-04-26
Supplement: 41598_2021_88318_MOESM1_ESM.pdf [file 41598_2021_88318_MOESM1_ESM.pdf]

# **Whole genome-based characterisation of antimicrobial resistance and genetic diversity in *Campylobacter jejuni* and *Campylobacter coli* from ruminants**

Medelin Ocejo<sup>1</sup>, Beatriz Oporto<sup>1</sup>, José Luis Lavín<sup>2</sup> and Ana Hurtado<sup>1,\*</sup>

<sup>1</sup> Animal Health Department, NEIKER – Basque Institute for Agricultural Research and Development, Basque Research and Technology Alliance (BRTA), Bizkaia Science and Technology Park 812L, 48160 Derio, Bizkaia, Spain.

<sup>2</sup> Applied Mathematics Department, Bioinformatics Unit, NEIKER – Basque Institute for Agricultural Research and Development, Basque Research and Technology Alliance (BRTA), Bizkaia Science and Technology Park 812L, 48160 Derio, Bizkaia, Spain.

\*ahurtado@neiker.eus

**Supplementary Information file**

**Table S1.** Isolate metadata and phenotypic antimicrobial resistance data.

| Isolate | Sampling year | Species          | Host         | ST    | CC | AMR phenotypic profile | Minimum inhibitory concentration (mg/L) <sup>c</sup> |        |      |     |        |      |       |
|---------|---------------|------------------|--------------|-------|----|------------------------|------------------------------------------------------|--------|------|-----|--------|------|-------|
|         |               |                  |              |       |    |                        | AMP                                                  | CIP    | NAL  | ERY | GEN    | STR  | TET   |
| C0574   | 2014          | <i>C. jejuni</i> | Dairy cattle | 19    | 21 | CIP-NAL                | 1.5                                                  | 8      | > 64 | < 1 | 0.5    | 2    | ≤ 0.5 |
| C0585   | 2014          | <i>C. jejuni</i> | Beef cattle  | 21    | 21 | CIP-NAL-TET            | 1                                                    | 16     | > 64 | < 1 | 0.5    | 2    | 32    |
| C0596   | 2015          | <i>C. jejuni</i> | Beef cattle  | 21    | 21 | CIP-NAL-TET            | 0.5                                                  | 8      | > 64 | < 1 | 0.25   | 1    | > 64  |
| C0642   | 2014          | <i>C. jejuni</i> | Beef cattle  | 21    | 21 | CIP-NAL-STR-TET        | 1.5                                                  | 8      | > 64 | < 1 | 0.25   | > 16 | 64    |
| C0459   | 2014          | <i>C. jejuni</i> | Dairy cattle | 21    | 21 | CIP-NAL-TET            | 0.5                                                  | 16     | > 64 | < 1 | 0.5    | 2    | 64    |
| C0560   | 2016          | <i>C. jejuni</i> | Dairy cattle | 21    | 21 | CIP-NAL-TET            | 0.5                                                  | 8      | > 64 | < 1 | 0.5    | 2    | 64    |
| C0612   | 2015          | <i>C. jejuni</i> | Sheep        | 21    | 21 | AMP-CIP-NAL-TET        | >256                                                 | 16     | > 64 | < 1 | 0.5    | 2    | 16    |
| C0609   | 2015          | <i>C. jejuni</i> | Beef cattle  | 47    | 21 | CIP-NAL                | 2                                                    | 16     | > 64 | < 1 | ≤ 0.12 | 1    | ≤ 0.5 |
| C0651   | 2015          | <i>C. jejuni</i> | Sheep        | 50    | 21 | CIP-NAL                | 1.5                                                  | 8      | > 64 | < 1 | 0.5    | 2    | ≤ 0.5 |
| C0662   | 2015          | <i>C. jejuni</i> | Beef cattle  | 53    | 21 | Non-available          | 2                                                    | NA     | NA   | NA  | NA     | NA   | NA    |
| C0582   | 2015          | <i>C. jejuni</i> | Dairy cattle | 53    | 21 | TET                    | 1                                                    | ≤ 0.12 | 4    | < 1 | 0.5    | 2    | 64    |
| C0437   | 2014          | <i>C. jejuni</i> | Sheep        | 883   | 21 | AMP-CIP-NAL-TET        | 32                                                   | 16     | > 64 | < 1 | 0.5    | 2    | > 64  |
| C0622   | 2015          | <i>C. jejuni</i> | Beef cattle  | 3769  | 21 | AMP-CIP-NAL-TET        | 32                                                   | 16     | > 64 | < 1 | 0.5    | 2    | 4     |
| C0669   | 2014          | <i>C. jejuni</i> | Dairy cattle | 3769  | 21 | AMP-CIP-NAL-TET        | 64                                                   | 16     | > 64 | < 1 | 0.5    | 2    | 4     |
| C0615   | 2016          | <i>C. jejuni</i> | Beef cattle  | 22    | 22 | CIP-NAL                | 0.75                                                 | 8      | > 64 | < 1 | 0.5    | 2    | ≤ 0.5 |
| C0575   | 2015          | <i>C. jejuni</i> | Dairy cattle | 22    | 22 | CIP-NAL                | 0.75                                                 | 8      | 64   | < 1 | 0.5    | 2    | ≤ 0.5 |
| C0882   | 2019          | <i>C. jejuni</i> | Dairy cattle | 459   | 42 | CIP-NAL-TET            | 0.5                                                  | 8      | > 64 | < 1 | 0.5    | 2    | > 64  |
| C0426   | 2014          | <i>C. jejuni</i> | Dairy cattle | 6010  | 42 | TET                    | 0.25                                                 | ≤ 0.12 | 4    | < 1 | 0.5    | 2    | 32    |
| C0584   | 2014          | <i>C. jejuni</i> | Beef cattle  | 6532  | 42 | CIP-NAL-STR-TET        | 0.25                                                 | 8      | > 64 | < 1 | 0.5    | > 16 | 64    |
| C0658   | 2014          | <i>C. jejuni</i> | Dairy cattle | 6532  | 42 | CIP-NAL-STR-TET        | 0.38                                                 | 8      | > 64 | < 1 | 0.5    | > 16 | 64    |
| C0577   | 2015          | <i>C. jejuni</i> | Sheep        | 6532  | 42 | CIP-NAL-STR-TET        | 0.38                                                 | 8      | > 64 | < 1 | 0.5    | > 16 | 64    |
| C0631   | 2016          | <i>C. jejuni</i> | Sheep        | 45    | 45 | SUSCEPTIBLE            | 3                                                    | ≤ 0.12 | 4    | < 1 | 0.5    | 2    | ≤ 0.5 |
| C0424   | 2014          | <i>C. jejuni</i> | Sheep        | 48    | 48 | CIP-NAL                | 0.5                                                  | 16     | > 64 | < 1 | 0.5    | 2    | ≤ 0.5 |
| C0644   | 2014          | <i>C. jejuni</i> | Sheep        | 10653 | 49 | CIP-NAL                | 6                                                    | 16     | > 64 | < 1 | 0.5    | 2    | ≤ 0.5 |
| C0576   | 2015          | <i>C. jejuni</i> | Dairy cattle | 52    | 52 | AMP-CIP-NAL-TET        | 16                                                   | 16     | > 64 | < 1 | 1      | 2    | > 64  |

|       |      |                  |              |       |     |                             |       |        |      |       |        |      |       |
|-------|------|------------------|--------------|-------|-----|-----------------------------|-------|--------|------|-------|--------|------|-------|
| C0593 | 2015 | <i>C. jejuni</i> | Beef cattle  | 61    | 61  | TET                         | 1     | ≤ 0.12 | 8    | < 1   | 0.5    | 2    | 64    |
| C0672 | 2015 | <i>C. jejuni</i> | Sheep        | 122   | 206 | CIP-NAL-TET                 | 2     | 16     | > 64 | < 1   | 0.5    | 2    | 64    |
| C0462 | 2014 | <i>C. jejuni</i> | Beef cattle  | 572   | 206 | AMP-CIP-NAL-TET             | 48    | 8      | > 64 | < 1   | ≤ 0.12 | 1    | 64    |
| C0268 | 2005 | <i>C. jejuni</i> | Sheep        | 572   | 206 | AMP-CIP                     | 32    | 1      | 16   | < 1   | 0.5    | 4    | 1     |
| C0630 | 2016 | <i>C. jejuni</i> | Sheep        | 3188  | 206 | CIP-NAL-TET                 | 1.5   | 8      | 64   | < 1   | 0.5    | 2    | 32    |
| C0599 | 2016 | <i>C. jejuni</i> | Sheep        | 3188  | 206 | CIP-NAL-TET                 | 1     | 8      | > 64 | < 1   | 0.5    | 2    | 64    |
| C0639 | 2014 | <i>C. jejuni</i> | Dairy cattle | 356   | 353 | AMP-CIP-NAL-TET             | >256  | 8      | 64   | < 1   | 0.25   | 1    | 32    |
| C0614 | 2016 | <i>C. jejuni</i> | Beef cattle  | 5396  | 353 | AMP-CIP-NAL-TET             | 32    | 8      | > 64 | < 1   | 0.5    | 1    | 16    |
| C0667 | 2014 | <i>C. jejuni</i> | Dairy cattle | 10657 | 354 | AMP-CIP-NAL-TET             | > 256 | 8      | > 64 | < 1   | 0.5    | 1    | 32    |
| C0661 | 2015 | <i>C. jejuni</i> | Beef cattle  | 10654 | 460 | CIP-NAL-TET                 | 0.25  | 8      | 64   | < 1   | 0.25   | 1    | 32    |
| C0655 | 2016 | <i>C. jejuni</i> | Beef cattle  | 607   | 607 | AMP-CIP-NAL-TET             | > 256 | 16     | > 64 | < 1   | 0.5    | 2    | 64    |
| C0623 | 2015 | <i>C. jejuni</i> | Beef cattle  | 1044  | 658 | AMP-TET                     | 96    | ≤ 0.12 | 4    | < 1   | 0.5    | 2    | > 64  |
| C0455 | 2014 | <i>C. jejuni</i> | Dairy cattle | 441   | -   | AMP-CIP-NAL-TET             | 48    | 4      | > 64 | < 1   | 0.5    | 2    | 64    |
| C0578 | 2015 | <i>C. jejuni</i> | Dairy cattle | 441   | -   | AMP-CIP-NAL-TET             | 64    | 8      | 64   | < 1   | 0.5    | 1    | 64    |
| C0443 | 2014 | <i>C. jejuni</i> | Beef cattle  | 10652 | -   | CIP-NAL-TET                 | 1.5   | 16     | > 64 | < 1   | 0.5    | 2    | > 64  |
| C0140 | 2004 | <i>C. coli</i>   | Dairy cattle | 825   | 828 | AMP-CIP-ERY-GEN-NAL-STR-TET | > 256 | 16     | > 64 | > 128 | > 16   | > 16 | > 64  |
| C0562 | 2016 | <i>C. coli</i>   | Sheep        | 825   | 828 | CIP-NAL-STR-TET             | 2     | 16     | > 64 | < 1   | 2      | > 16 | > 64  |
| C0025 | 2004 | <i>C. coli</i>   | Sheep        | 825   | 828 | ERY-TET                     | 2     | 0.25   | 8    | > 128 | 1      | 4    | > 64  |
| C0663 | 2015 | <i>C. coli</i>   | Beef cattle  | 827   | 828 | AMP-CIP-NAL-STR-TET         | 16    | > 16   | > 64 | < 1   | 0.5    | > 16 | > 64  |
| C0535 | 2014 | <i>C. coli</i>   | Dairy cattle | 827   | 828 | STR-TET                     | 8     | ≤ 0.12 | 8    | < 1   | 0.5    | > 16 | > 64  |
| C0551 | 2015 | <i>C. coli</i>   | Dairy cattle | 827   | 828 | CIP-NAL-STR-TET             | 4     | 16     | > 64 | < 1   | 0.5    | > 16 | > 64  |
| C0558 | 2015 | <i>C. coli</i>   | Sheep        | 827   | 828 | CIP-NAL-TET                 | 4     | 16     | > 64 | < 1   | 0.5    | 4    | > 64  |
| C0561 | 2016 | <i>C. coli</i>   | Sheep        | 827   | 828 | CIP-NAL-STR-TET             | 4     | 8      | 64   | < 1   | 1      | > 16 | > 64  |
| C0601 | 2016 | <i>C. coli</i>   | Sheep        | 827   | 828 | STR-TET                     | 8     | ≤ 0.12 | 4    | < 1   | 1      | 8    | 64    |
| C0563 | 2016 | <i>C. coli</i>   | Sheep        | 827   | 828 | CIP-NAL-STR-TET             | 8     | 8      | > 64 | < 1   | 2      | > 16 | > 64  |
| C0554 | 2015 | <i>C. coli</i>   | Sheep        | 827   | 828 | CIP-NAL-STR-TET             | 6     | 16     | > 64 | < 1   | 0.5    | > 16 | > 64  |
| C0444 | 2014 | <i>C. coli</i>   | Sheep        | 827   | 828 | SUSCEPTIBLE                 | 8     | ≤ 0.12 | 8    | < 1   | 0.5    | 2    | ≤ 0.5 |
| C0544 | 2015 | <i>C. coli</i>   | Beef cattle  | 1055  | 828 | SUSCEPTIBLE                 | 3     | ≤ 0.12 | 4    | < 1   | 1      | 4    | ≤ 0.5 |
| C0430 | 2014 | <i>C. coli</i>   | Dairy cattle | 1055  | 828 | STR                         | 3     | ≤ 0.12 | 8    | < 1   | 1      | 8    | ≤ 0.5 |

|                    |      |                |              |      |     |                             |                 |                |                |                 |                |                |                |
|--------------------|------|----------------|--------------|------|-----|-----------------------------|-----------------|----------------|----------------|-----------------|----------------|----------------|----------------|
| C0553              | 2015 | <i>C. coli</i> | Sheep        | 1177 | 828 | CIP-NAL-STR-TET             | 2               | <b>8</b>       | <b>&gt; 64</b> | < 1             | 1              | <b>&gt; 16</b> | <b>32</b>      |
| C0545              | 2015 | <i>C. coli</i> | Sheep        | 1590 | 828 | AMP-STR-TET                 | <b>&gt; 256</b> | ≤ 0.12         | 4              | < 1             | 0.5            | <b>&gt; 16</b> | <b>32</b>      |
| C0673              | 2015 | <i>C. coli</i> | Sheep        | 1595 | 828 | AMP-CIP-NAL-STR-TET         | <b>&gt; 256</b> | <b>8</b>       | <b>&gt; 64</b> | < 1             | 1              | <b>&gt; 16</b> | <b>64</b>      |
| C0540 <sup>a</sup> | 2014 | <i>C. coli</i> | Dairy cattle | 2097 | 828 | AMP-CIP-ERY-NAL-TET         | <b>&gt; 256</b> | <b>16</b>      | <b>&gt; 64</b> | <b>&gt; 128</b> | 1              | 4              | <b>&gt; 64</b> |
| C0541 <sup>a</sup> | 2014 | <i>C. coli</i> | Dairy cattle | 2097 | 828 | AMP-CIP-ERY-GEN-NAL-STR-TET | <b>&gt; 256</b> | <b>16</b>      | <b>&gt; 64</b> | <b>&gt; 128</b> | <b>&gt; 16</b> | <b>&gt; 16</b> | <b>&gt; 64</b> |
| C0680              | 2015 | <i>C. coli</i> | Dairy cattle | 2097 | 828 | AMP-CIP-ERY-GEN-NAL-STR-TET | <b>&gt; 256</b> | <b>&gt; 16</b> | <b>&gt; 64</b> | <b>&gt; 128</b> | <b>&gt; 16</b> | <b>&gt; 16</b> | <b>&gt; 64</b> |
| C0677 <sup>b</sup> | 2016 | <i>C. coli</i> | Dairy cattle | 2097 | 828 | AMP-CIP-ERY-GEN-NAL-STR-TET | <b>&gt; 256</b> | <b>&gt; 16</b> | <b>&gt; 64</b> | <b>&gt; 128</b> | <b>&gt; 16</b> | <b>&gt; 16</b> | <b>&gt; 64</b> |
| C0678 <sup>b</sup> | 2016 | <i>C. coli</i> | Dairy cattle | 2097 | 828 | AMP-CIP-ERY-GEN-NAL-STR-TET | <b>64</b>       | <b>&gt; 16</b> | <b>&gt; 64</b> | <b>&gt; 128</b> | <b>&gt; 16</b> | <b>&gt; 16</b> | <b>&gt; 64</b> |
| C0566              | 2016 | <i>C. coli</i> | Dairy cattle | 2097 | 828 | AMP-CIP-GEN-NAL-STR-TET     | <b>96</b>       | <b>16</b>      | <b>&gt; 64</b> | < 1             | <b>&gt; 16</b> | <b>&gt; 16</b> | <b>&gt; 64</b> |
| C0539              | 2014 | <i>C. coli</i> | Beef cattle  | 5111 | 828 | CIP-NAL-TET                 | 6               | <b>8</b>       | <b>64</b>      | < 1             | 0.5            | 2              | <b>&gt; 64</b> |
| C0428              | 2014 | <i>C. coli</i> | Sheep        | 5380 | 828 | CIP-NAL-TET                 | 4               | <b>16</b>      | <b>&gt; 64</b> | < 1             | 0.5            | 2              | <b>&gt; 64</b> |
| C0564              | 2016 | <i>C. coli</i> | Dairy cattle | 6510 | 828 | AMP-CIP-NAL-STR-TET         | <b>&gt; 256</b> | <b>&gt; 16</b> | <b>64</b>      | < 1             | 0.5            | <b>&gt; 16</b> | <b>&gt; 64</b> |
| C0538              | 2014 | <i>C. coli</i> | Dairy cattle | 6775 | 828 | CIP-NAL-TET                 | 1.5             | <b>16</b>      | <b>&gt; 64</b> | < 1             | 0.5            | 2              | <b>&gt; 64</b> |
| C0548              | 2015 | <i>C. coli</i> | Beef cattle  | 8313 | 828 | CIP-NAL-STR-TET             | 4               | <b>&gt; 16</b> | <b>&gt; 64</b> | < 1             | 0.5            | <b>16</b>      | <b>&gt; 64</b> |
| C0546              | 2015 | <i>C. coli</i> | Beef cattle  | 8857 | -   | CIP-NAL-STR-TET             | 2               | <b>&gt; 16</b> | <b>&gt; 64</b> | < 1             | 1              | <b>&gt; 16</b> | <b>&gt; 64</b> |
| C0559              | 2016 | <i>C. coli</i> | Sheep        | 8857 | -   | CIP-NAL-STR                 | 6               | <b>&gt; 16</b> | <b>&gt; 64</b> | < 1             | 0.5            | <b>&gt; 16</b> | ≤ 0.5          |

<sup>a, b</sup>, Isolates with the same superscript were isolated in the same farm.

<sup>c</sup>, values above the ECOFF are indicated in bold red. Ampicillin, AMP >8 mg/L; ciprofloxacin, CIP >0.5mg/L; nalidixic acid, NAL >16 mg/L; erythromycin, ERY >8mg/L (*C. coli*) and >4 mg/L (*C. jejuni*); gentamicin, GEN >2mg/L; streptomycin, STR >4 mg/L; tetracycline, TET >2 mg/L (*C. coli*) and >1 mg/L (*C. jejuni*). Results for CIP, NAL, ERY, GEN, STR and TET were already published (Ocejo et al., 2019); results for AMP are part of this study.

**Table S2.** Overview of sequencing raw data and assembly for each sample.

| Raw Reads Stats |                  |             |             | Assembly Stats |                |        |                    |      |
|-----------------|------------------|-------------|-------------|----------------|----------------|--------|--------------------|------|
| Isolate         | Species          | Total reads | Coverage X) | N contigs      | Largest Contig | N50    | Genome Length (bp) | %GC  |
| C0268           | <i>C. jejuni</i> | 12934244    | 1173        | 73             | 226969         | 154175 | 1653564            | 30.5 |
| C0424           | <i>C. jejuni</i> | 10540130    | 958         | 41             | 412558         | 197793 | 1650143            | 30.5 |
| C0426           | <i>C. jejuni</i> | 12245504    | 1074        | 39             | 375606         | 187262 | 1709280            | 30.5 |
| C0437           | <i>C. jejuni</i> | 14300506    | 1248        | 66             | 546850         | 153956 | 1717905            | 30.5 |
| C0443           | <i>C. jejuni</i> | 11988856    | 1060        | 88             | 388021         | 113547 | 1696244            | 30.5 |
| C0455           | <i>C. jejuni</i> | 13069366    | 1166        | 52             | 581808         | 156346 | 1680588            | 30.5 |
| C0459           | <i>C. jejuni</i> | 10414200    | 931         | 60             | 410914         | 155089 | 1676447            | 30.5 |
| C0462           | <i>C. jejuni</i> | 12836158    | 1092        | 32             | 772278         | 191279 | 1762483            | 30.4 |
| C0560           | <i>C. jejuni</i> | 17067854    | 1520        | 79             | 230397         | 154524 | 1683741            | 30.5 |
| C0574           | <i>C. jejuni</i> | 10859498    | 981         | 36             | 402450         | 153949 | 1659726            | 30.4 |
| C0575           | <i>C. jejuni</i> | 11498010    | 1042        | 34             | 235461         | 184884 | 1654883            | 30.5 |
| C0576           | <i>C. jejuni</i> | 10232652    | 907         | 37             | 358497         | 211364 | 1691424            | 30.4 |
| C0577           | <i>C. jejuni</i> | 13380738    | 1246        | 43             | 336369         | 212864 | 1609799            | 30.6 |
| C0578           | <i>C. jejuni</i> | 12901696    | 1152        | 54             | 416441         | 156346 | 1678853            | 30.5 |
| C0582           | <i>C. jejuni</i> | 9723978     | 895         | 43             | 556545         | 298216 | 1628019            | 30.6 |
| C0584           | <i>C. jejuni</i> | 13908460    | 1294        | 53             | 336160         | 212864 | 1612235            | 30.6 |
| C0585           | <i>C. jejuni</i> | 15730320    | 1376        | 62             | 406922         | 140820 | 1713798            | 30.4 |
| C0593           | <i>C. jejuni</i> | 11641514    | 1049        | 46             | 406509         | 232929 | 1663253            | 30.4 |
| C0596           | <i>C. jejuni</i> | 10812544    | 933         | 63             | 409211         | 139199 | 1738344            | 30.5 |
| C0599           | <i>C. jejuni</i> | 11557242    | 981         | 78             | 576024         | 105433 | 1766292            | 30.4 |
| C0609           | <i>C. jejuni</i> | 15310196    | 1374        | 50             | 500065         | 255847 | 1670710            | 30.5 |
| C0612           | <i>C. jejuni</i> | 11351426    | 974         | 47             | 407161         | 154480 | 1747161            | 30.4 |
| C0614           | <i>C. jejuni</i> | 12462898    | 1096        | 95             | 314832         | 188509 | 1705294            | 30.5 |
| C0615           | <i>C. jejuni</i> | 10042304    | 929         | 47             | 230341         | 151286 | 1621057            | 30.5 |
| C0622           | <i>C. jejuni</i> | 10893806    | 984         | 35             | 402447         | 159911 | 1659826            | 30.5 |
| C0623           | <i>C. jejuni</i> | 11680350    | 1054        | 43             | 404577         | 215773 | 1661697            | 30.5 |
| C0630           | <i>C. jejuni</i> | 9920180     | 844         | 68             | 403655         | 108264 | 1761096            | 30.4 |
| C0631           | <i>C. jejuni</i> | 11308098    | 1015        | 55             | 307379         | 204078 | 1670764            | 30.5 |
| C0639           | <i>C. jejuni</i> | 12880436    | 1119        | 47             | 334575         | 183859 | 1725830            | 30.3 |
| C0642           | <i>C. jejuni</i> | 11959798    | 1032        | 51             | 590192         | 104959 | 1737520            | 30.5 |
| C0644           | <i>C. jejuni</i> | 12786404    | 1157        | 42             | 546255         | 289216 | 1656869            | 30.5 |
| C0651           | <i>C. jejuni</i> | 12295578    | 1130        | 44             | 645526         | 188193 | 1632065            | 30.5 |
| C0655           | <i>C. jejuni</i> | 8773988     | 702         | 176            | 259598         | 91985  | 1872331            | 30.1 |
| C0658           | <i>C. jejuni</i> | 13181088    | 1229        | 43             | 319610         | 186698 | 1608075            | 30.6 |
| C0661           | <i>C. jejuni</i> | 12878332    | 1059        | 83             | 297925         | 139572 | 1823462            | 30.2 |
| C0662           | <i>C. jejuni</i> | 13719044    | 1237        | 49             | 419090         | 180719 | 1663018            | 30.4 |
| C0667           | <i>C. jejuni</i> | 15428792    | 1333        | 62             | 339673         | 208934 | 1736132            | 30.3 |
| C0669           | <i>C. jejuni</i> | 15009370    | 1354        | 44             | 567135         | 159910 | 1661932            | 30.5 |
| C0672           | <i>C. jejuni</i> | 6656444     | 593         | 34             | 440430         | 160973 | 1682240            | 30.5 |

|       |                  |          |      |    |        |        |         |      |
|-------|------------------|----------|------|----|--------|--------|---------|------|
| C0882 | <i>C. jejuni</i> | 14705740 | 1345 | 49 | 224960 | 150692 | 1639337 | 30.5 |
| C0025 | <i>C. coli</i>   | 10122034 | 917  | 49 | 446779 | 172397 | 1654969 | 31.4 |
| C0140 | <i>C. coli</i>   | 10979218 | 983  | 37 | 596293 | 265693 | 1673787 | 31.5 |
| C0428 | <i>C. coli</i>   | 16828292 | 1530 | 23 | 815050 | 255274 | 1649310 | 31.4 |
| C0430 | <i>C. coli</i>   | 11474124 | 1043 | 32 | 596292 | 395173 | 1649217 | 31.5 |
| C0444 | <i>C. coli</i>   | 12233762 | 1097 | 52 | 598846 | 266139 | 1672213 | 31.4 |
| C0535 | <i>C. coli</i>   | 12342818 | 1108 | 24 | 596148 | 403503 | 1669892 | 31.4 |
| C0538 | <i>C. coli</i>   | 16454080 | 1441 | 63 | 285352 | 210646 | 1711832 | 31.3 |
| C0539 | <i>C. coli</i>   | 15546954 | 1319 | 88 | 278640 | 130395 | 1767284 | 31.4 |
| C0540 | <i>C. coli</i>   | 12493926 | 1044 | 38 | 281441 | 162622 | 1793431 | 31.3 |
| C0541 | <i>C. coli</i>   | 13483176 | 1110 | 96 | 281441 | 147642 | 1820453 | 31.4 |
| C0544 | <i>C. coli</i>   | 16741992 | 1523 | 36 | 596291 | 265706 | 1648196 | 31.5 |
| C0545 | <i>C. coli</i>   | 14110464 | 1277 | 51 | 380940 | 215171 | 1656510 | 31.4 |
| C0546 | <i>C. coli</i>   | 10837624 | 914  | 60 | 417840 | 215914 | 1777565 | 31.3 |
| C0548 | <i>C. coli</i>   | 18585354 | 1675 | 34 | 396807 | 196506 | 1663543 | 31.4 |
| C0551 | <i>C. coli</i>   | 9191142  | 811  | 31 | 590028 | 402358 | 1698856 | 31.4 |
| C0553 | <i>C. coli</i>   | 12929314 | 1062 | 51 | 313038 | 163968 | 1825109 | 31.2 |
| C0554 | <i>C. coli</i>   | 16326156 | 1437 | 46 | 596396 | 265702 | 1704116 | 31.4 |
| C0558 | <i>C. coli</i>   | 14428070 | 1294 | 36 | 827468 | 265684 | 1671537 | 31.5 |
| C0559 | <i>C. coli</i>   | 14532030 | 1248 | 71 | 379836 | 264568 | 1746486 | 31.2 |
| C0561 | <i>C. coli</i>   | 14042064 | 1256 | 42 | 442254 | 229068 | 1676468 | 31.4 |
| C0562 | <i>C. coli</i>   | 11966072 | 1075 | 32 | 396508 | 181044 | 1669298 | 31.4 |
| C0563 | <i>C. coli</i>   | 12675758 | 1136 | 34 | 380950 | 229088 | 1673402 | 31.4 |
| C0564 | <i>C. coli</i>   | 10813858 | 953  | 43 | 443471 | 226674 | 1700557 | 31.4 |
| C0566 | <i>C. coli</i>   | 11977774 | 1030 | 51 | 281500 | 162622 | 1743404 | 31.4 |
| C0601 | <i>C. coli</i>   | 11763842 | 1056 | 31 | 585237 | 265699 | 1670365 | 31.4 |
| C0663 | <i>C. coli</i>   | 14313310 | 1278 | 43 | 594415 | 265686 | 1679325 | 31.5 |
| C0673 | <i>C. coli</i>   | 9951316  | 867  | 35 | 435153 | 218424 | 1721131 | 31.4 |
| C0677 | <i>C. coli</i>   | 15002976 | 1290 | 58 | 284762 | 163975 | 1744337 | 31.4 |
| C0678 | <i>C. coli</i>   | 17061266 | 1471 | 38 | 284764 | 163976 | 1739270 | 31.4 |
| C0680 | <i>C. coli</i>   | 10690064 | 862  | 48 | 280581 | 139165 | 1859162 | 31.2 |

**Figure S1.** Circular map of the pTet (type-1) plasmid of *C. jejuni* isolates C0599, C0585, C0612 and C063, along with plasmid pFB1TET of *C. coli* strain FB1 (Acc. Nr. CP011017) as an outer circle.

The BLAST Ring Image Generator (BRIG) software <sup>1</sup> was used for comparison analysis of plasmids and image generation.

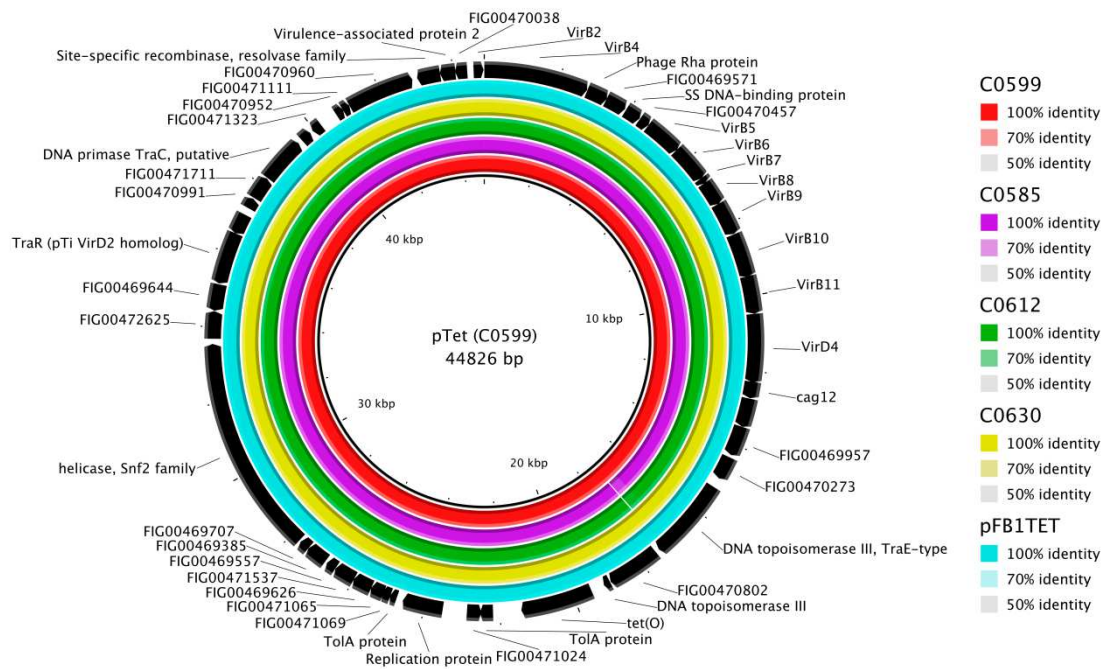

## References

1. Alikhan, N. F., Petty, N. K., Ben Zakour, N. L. & Beatson, S. A. BLAST Ring Image Generator (BRIG): Simple prokaryote genome comparisons. *BMC Genomics* **12**, 402 (2011).
